# Supplementary material for: Type-I PtS2/MoS2 van der Waals heterojunctions with tunable photovoltaic effects and high photosensitivity
Source: Royal Society of Chemistry journal article supplement (doi:10.1039/d2nr04231b), 2022-01-01
Supplement: d2nr04231b1.pdf [file d2nr04231b1.pdf]

# Supporting Information

## Type-I PtS<sub>2</sub>/MoS<sub>2</sub> van der Waals Heterojunction with Tunable Photovoltaic Effect and High Photosensitivity

Hui Zhang,<sup>a</sup> Zihan Wang,<sup>a</sup> Jiawang Chen,<sup>b</sup> Chaoyang Tan,<sup>a</sup> Shiqi Yin,<sup>a</sup> Hanlin Zhang,<sup>a</sup> Shaotian Wang,<sup>a</sup> Qinggang Qin,<sup>a</sup> and Liang Li<sup>\*a,b</sup>

<sup>a</sup>Institutes of Physical Science and Information Technology, Anhui University, Hefei 230601, P. R. China

<sup>b</sup>Key Laboratory of Materials Physics, Anhui Key Laboratory of Nanomaterials and Nanotechnology, Institute of Solid State Physics, Hefei Institutes of Physical Science, Chinese Academy of Sciences, Hefei 230031, P.R. China, University of Science and Technology of China, Hefei 230026, P.R. China

\*Corresponding author (liliang@issp.ac.cn)

## Experimental section:

### Device Fabrication

The type-I PtS<sub>2</sub>/MoS<sub>2</sub> vdWH device proposed in this work were fabricated by a dry transfer method using PDMS as carrier. First, thick PtS<sub>2</sub> and thin MoS<sub>2</sub> flakes were exfoliated from the bulk counterparts using Scotch tape and then transferred onto a silicon substrate where is covered with 300 nm thick SiO<sub>2</sub>. Next, the electrode patterns were defined by electron-beam lithography (EBL, eLINE Plus, Raith), and Ti/Au (15/50 nm) metals were deposited on the silicon substrate by electron beam evaporation and thermal evaporation, respectively. Finally, the plated device was treated by a standard lift-off process in acetone.

### Device Characterization and Measurement

The type-I PtS<sub>2</sub>/MoS<sub>2</sub> vdWH device was investigated by an optical microscope (WMJ-9688). Raman spectra were measured at room temperature by a Raman/photoluminescence (PL) system (FST2-Ahdx-DZ) equipped with a monochromator and 532 nm laser source. The thickness of the layers and the surface potential were obtained simultaneously by KPFM measurement (Hitachi AFM5500M). The electrical properties of the fabricated devices were measured in a probe station (HFS600E-PB4) using a semiconductor device parameter analyzer (Keithley 4200A-SCS). For photoresponse measurements, the 685 nm laser was keep irradiating on the effective area of the device. All the device measurements were conducted at room temperature in an ambient environment.

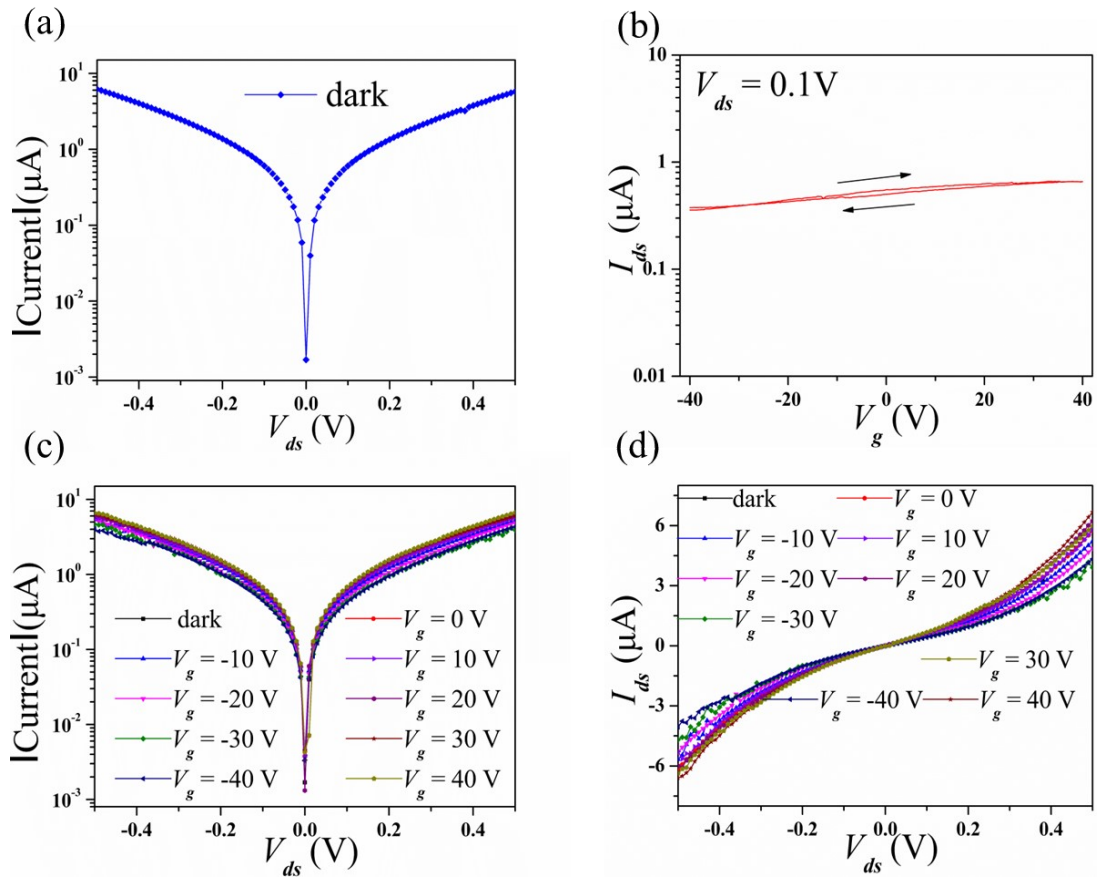

**Figure S1.** Electrical characterizations of the individual PtS<sub>2</sub> FET. a)  $I_{ds}$  -  $V_{ds}$  characteristics of the PtS<sub>2</sub> FET in the dark. b) Transfer curve of the PtS<sub>2</sub> FET at  $V_{ds} = 0.1$  V.  $I_{ds}$  -  $V_{ds}$  curves of the PtS<sub>2</sub> FET under different gate voltages in c) logarithmic scale and d) liner scale.

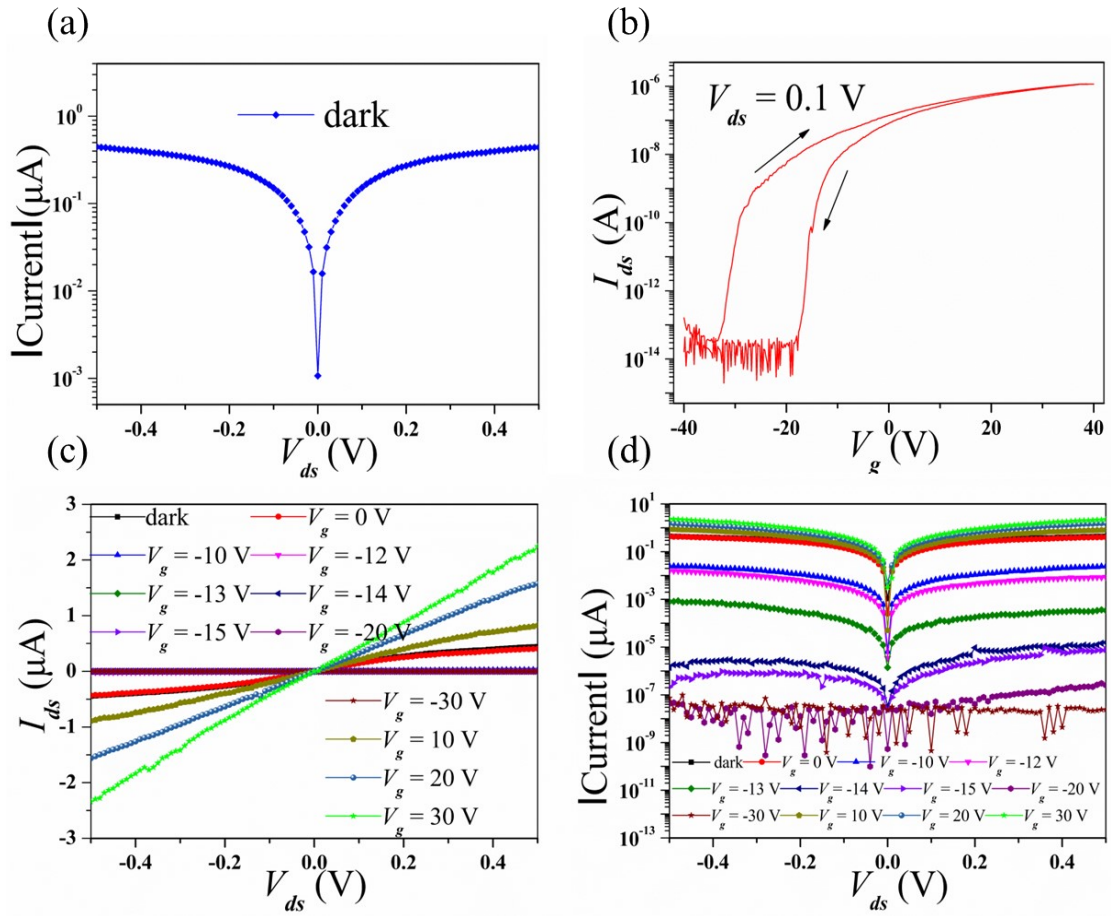

**Figure S2.** Electrical characterizations of the individual MoS<sub>2</sub> FET. a)  $I_{ds}$  -  $V_{ds}$  characteristics of the MoS<sub>2</sub> FET in the dark. b) Transfer curve of the MoS<sub>2</sub> FET at  $V_{ds} = 0.1 \text{ V}$ .  $I_{ds}$  -  $V_{ds}$  curves of the MoS<sub>2</sub> FET under different gate voltages in c) linear scale and d) logarithmic scale.

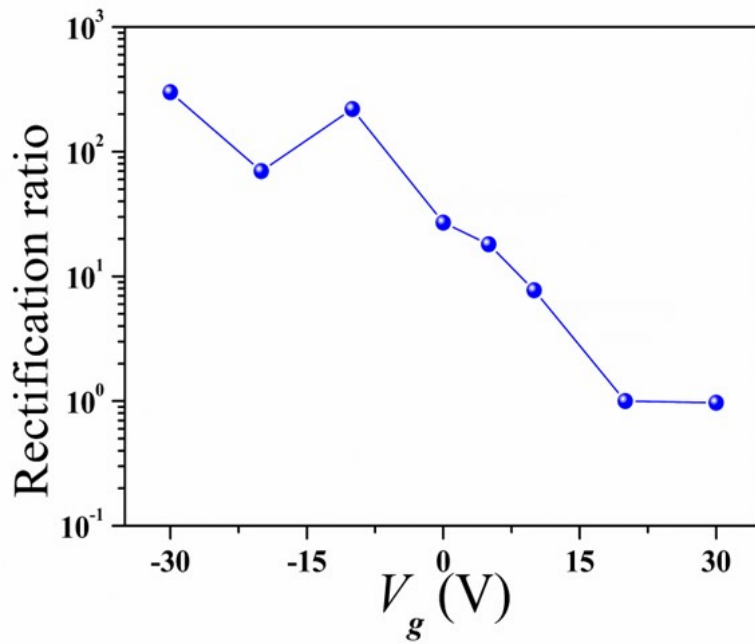

**Figure S3.** The forward rectification ratio of PtS<sub>2</sub>/MoS<sub>2</sub> heterojunction at various gate voltages.

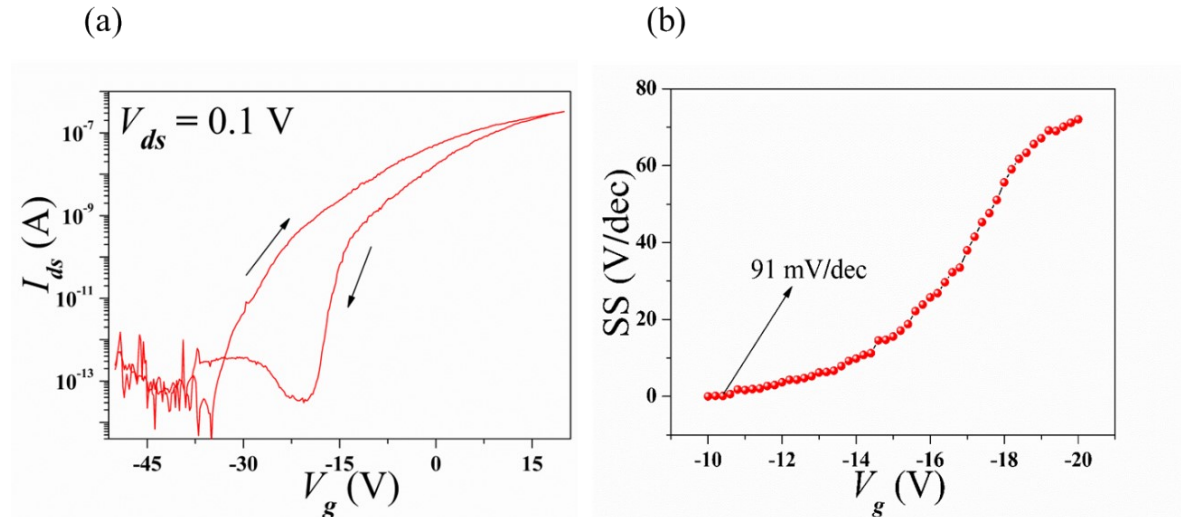

**Figure S4.** a)  $I_{ds}$  -  $V_g$  transfer curve of the PtS<sub>2</sub>/MoS<sub>2</sub> vdWH device in the main text. b) Subthreshold swing (SS) of the PtS<sub>2</sub>/MoS<sub>2</sub> vdWH device in the main text as a function of  $V_g$ .

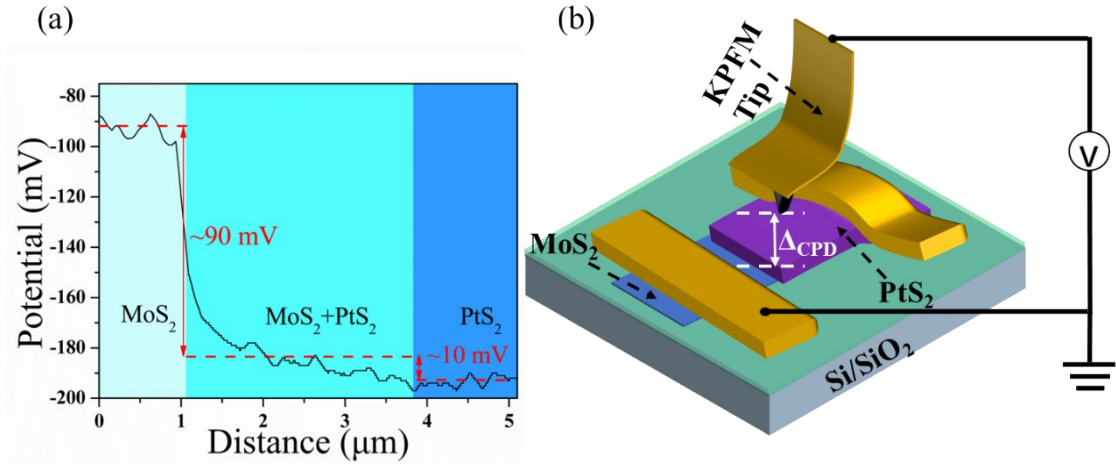

**Figure S5.** a) The surface potential profile in the region of MoS<sub>2</sub>, MoS<sub>2</sub>/PtS<sub>2</sub>, and PtS<sub>2</sub>. b) The schematic diagram of the measurement of KPFM, the value of  $\Delta_{\text{CPD}}$  is the surface potential of tip mental of Rh ( $\Phi_{\text{Tip}} = 4.9 \text{ eV}$ ) minus the surface potential of the heterojunction ( $\Delta_{\text{CPD}} = \Phi_{\text{Tip}} - \Phi_{\text{Sample}}$ ).

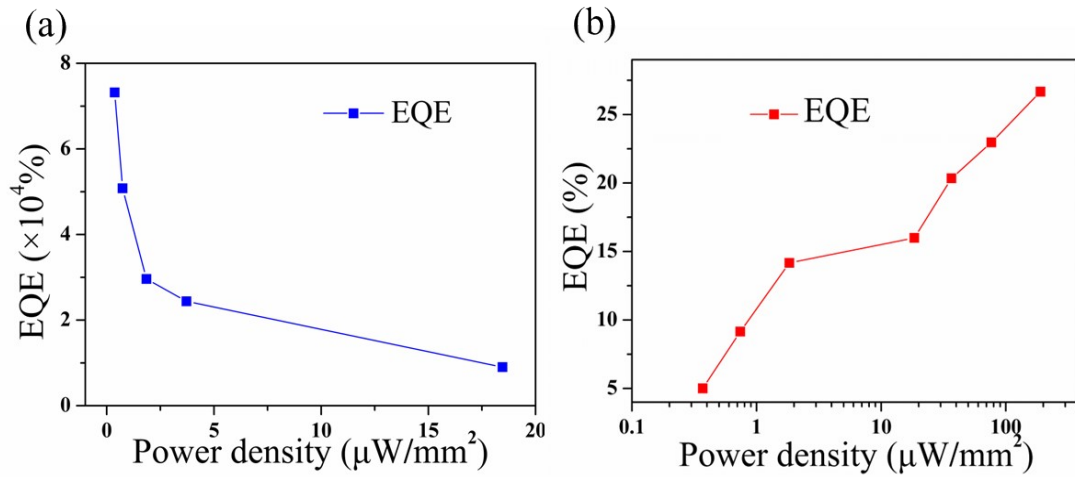

**Figure S6.** The calculated EQE values illuminated by 685 nm light at a)  $V_g = 0 \text{ V}$ ,  $V_{\text{ds}} = 0.1 \text{ V}$  and b)  $V_g = -40 \text{ V}$ ,  $V_{\text{ds}} = 0.1 \text{ V}$ .

**Table S1.** Comprehensive comparison of the critical parameters of fabricated PtS<sub>2</sub>/MoS<sub>2</sub> vdWHs with previously reported MoS<sub>2</sub> based photodetectors

| Materials                           | Wavelength (nm) | Condition                                   | R (A W <sup>-1</sup> ) | D* (Jones)            | EQE (%)              | Response time | Ref.      |
|-------------------------------------|-----------------|---------------------------------------------|------------------------|-----------------------|----------------------|---------------|-----------|
| PtS <sub>2</sub> /MoS <sub>2</sub>  | 685             | V <sub>g</sub> = 0, V <sub>ds</sub> = 0.1 V | 403                    | 1.07×10 <sup>11</sup> | 7.32×10 <sup>4</sup> | 24/21 ms      | This Work |
| MoS <sub>2</sub>                    | 532             | V <sub>g</sub> = 0, V <sub>ds</sub> = 1 V   | 15.6                   |                       |                      | 100ms         | 1         |
| ZnO-QDs/MoS <sub>2</sub>            | 635             | V <sub>g</sub> = 0, V <sub>ds</sub> = 1 V   | 0.084                  | 1.05×10 <sup>11</sup> | 25.7                 | 1.5/1.1s      | 2         |
| Si/MoS <sub>2</sub>                 | 532             | V <sub>g</sub> = 0, V <sub>ds</sub> = 3 V   | 117                    | 1×10 <sup>9</sup>     | 55                   | 74/115ms      | 3         |
| GaSe/MoS <sub>2</sub>               | 450             | V <sub>g</sub> = 0, V <sub>ds</sub> = 0     | 0.9                    | 6.5×10 <sup>9</sup>   |                      | 5/5 ms        | 4         |
| Graphene/MoS <sub>2</sub>           | 540             | V <sub>g</sub> = 0, V <sub>ds</sub> = 5 V   | 0.835                  |                       |                      | 20/30 ms      | 5         |
| PdSe <sub>2</sub> /MoS <sub>2</sub> | 532             | V <sub>g</sub> = 0, V <sub>ds</sub> = 0     | 9                      | 3×10 <sup>10</sup>    |                      | 125/7 ms      | 6         |
| MoTe <sub>2</sub> /MoS <sub>2</sub> | 470             | V <sub>g</sub> = 0, V <sub>ds</sub> = 0     | 0.322                  |                       | 85                   | 25 ms         | 7         |

## References

1. C. Nie, L. Yu, X. Wei, J. Shen, W. Lu, W. Chen, S. Feng and H. Shi, *Nanotechnology*, 2017, **28**, 275203.
2. Y. H. Zhou, Z. B. Zhang, P. Xu, H. Zhang and B. Wang, *Nanoscale Res. Lett.*, 2019, **14**, 364.
3. X. Liu, F. Li, M. Xu, T. Shen, Z. Yang, W. Fan and J. Qi, *Langmuir*, 2018, **34**, 14151-14157.
4. Z. Zou, J. Liang, X. Zhang, C. Ma, P. Xu, X. Yang, Z. Zeng, X. Sun, C. Zhu, D. Liang, X. Zhuang, D. Li and A. Pan, *ACS Nano*, 2021, **15**, 10039-10047.
5. Q. Liu, B. Cook, M. Gong, Y. Gong, D. Ewing, M. Casper, A. Stramel and J. Wu, *ACS Appl. Mater. Interfaces*, 2017, **9**, 12728-12733.
6. H. Wang, Z. Li, D. Li, X. Xu, P. Chen, L. Pi, X. Zhou and T. Zhai, *Adv. Funct. Mater.*, 2021, **31**, 2106105.
7. A. Pezeshki, S. H. Shokouh, T. Nazari, K. Oh and S. Im, *Adv. Mater.*, 2016, **28**, 3216-3222.
